# Supplementary material for: Circadian Oscillations Persist in Cervical and Esophageal Cancer Cells Displaying Decreased Expression of Tumor-Suppressing Circadian Clock Genes
Source: Oxford University Press journal article supplement (doi:10.1158/1541-7786.mcr-19-1074), 2020-06-05
Supplement: 15417786mcr191074-sup-231735_2_supp_6296538_q4brp5.docx [file 15417786mcr191074-sup-231735_2_supp_6296538_q4brp5.docx]

**Supplementary table 1. Correlations between gene expression fold changes (R values are shown)**

| Gene | *CLOCK* | *PER1* | *PER2* | *PER3* | *CRY1* | *REV-ERBα* | *RORα* |
| --- | --- | --- | --- | --- | --- | --- | --- |
| *CLOCK* | x | ns | **0.8** | **0.725** | **0.82** | **0.879** | ns |
| *PER1* | ns | x | ns | **0.76** | ns | ns | ns |
| *PER2* | **0.8** | ns | x | **0.664** | **0.947** | **0.879** | **0.785** |
| *PER3* | **0.725** | **0.76** | **0.664** | x | **0.769** | **0.762** | ns |
| *CRY1* | **0.82** | ns | **0.947** | **0.769** | x | **0.853** | ns |
| *REV-ERBα* | **0.879** | ns | **0.879** | **0.762** | **0.853** | x | ns |
| *RORα* | ns | ns | **0.785** | ns | ns | ns | x |

(ns: not significant)
